1 **Title**

2 Defining the Burden of Disease of RSV in Europe: estimates of RSV-associated  
3 hospitalisations in children under 5 years of age. A systematic review and modelling study.

4

5 **Authors:** Marco Del Riccio<sup>1</sup>, Peter Spreuwenberg<sup>1</sup>, Richard Osei-Yeboah<sup>3</sup>, Caroline K.  
6 Johannesen<sup>4</sup>, Liliana Vazquez Fernandez<sup>5</sup>, Anne C. Teirlinck<sup>6</sup>, Xin Wang<sup>7</sup>, Terho Heikkinen<sup>8</sup>,  
7 Mathieu Bangert<sup>9</sup>, Saverio Caini<sup>1</sup>, Harry Campbell<sup>3</sup>, John Paget<sup>1</sup> on behalf of the RESCEU  
8 investigators

9

10 **Affiliations:**

- 11 1. Netherlands Institute for Health Services Research (Nivel), Utrecht, The Netherlands  
12 2. Department of Health Sciences, University of Florence, 50134 Florence, Italy  
13 3. Centre for Global Health, Usher Institute, University of Edinburgh  
14 4. Statens Serum Institut, Copenhagen, Denmark  
15 5. Department of Methods Development & Analytics, Norwegian Institute of Public  
16 Health, Oslo, Norway  
17 6. Centre for Infectious Disease Control, National Institute for Public Health and the  
18 Environment, Bilthoven, the Netherlands  
19 7. School of Public Health, Nanjing Medical University, Nanjing, China  
20 8. Department of Pediatrics, University of Turku and Turku University Hospital, Turku,  
21 Finland  
22 9. Sanofi Vaccines, Lyon, France

23

24

25 **Abstract**

26 **Background:** Respiratory syncytial virus (RSV) infections cause an estimated 22-50 million  
27 episodes of acute lower respiratory infections (ALRI) every year in children younger than 5  
28 years. To date, no overall estimate of RSV-associated hospitalisations in children under 5 years  
29 has been published for the European Union (EU). Through statistical modelling, we estimated  
30 the RSV hospitalisation burden in children under 5 years of age in EU countries and Norway,  
31 by age group and country.

32 **Methods:** We collated national RSV-associated hospitalisation estimates calculated using  
33 linear regression models in children under 5 years via the RESCEU project for Denmark,  
34 England, Finland, Norway, the Netherlands and Scotland during 2006-2018. A systematic  
35 literature review was conducted to collect additional estimates. Using the multiple imputation  
36 and nearest neighbour matching extrapolation methods, we estimated RSV-associated  
37 hospitalisation rates in all EU countries.

38 **Results:** Additional estimates for Spain and France were found in the literature and added to  
39 the analysis. We estimated that an average of 245,244 (95%CI 224,688-265,799) hospital  
40 admissions with a respiratory infection per year were associated with RSV in children under  
41 the age of 5, with most cases occurring among children aged less than 1 year (75%). Infants  
42 aged less than 2 months represented the most affected group (71.6 per 1,000 children; 95%CI:  
43 66.6-76.6). The hospitalisation rates varied widely across countries: for example, estimated  
44 rates in the 0-2 months age group ranged from 47.4 (37.5-57.3) per 1,000 in the Netherlands to  
45 98.3 (88.5-108.1) per 1,000 in France.

46 **Conclusion:** To our knowledge, this is the first attempt to estimate the overall RSV  
47 hospitalisation burden in children under the age of 5 years in the EU. Our findings will help  
48 support decisions regarding prevention efforts, and they will also represent an important

49 benchmark to understand changes in the RSV burden following the introduction of RSV  
50 immunisation programs in Europe.

51

52 **Keywords:** Respiratory Syncytial Virus; Hospitalization; Burden of disease; Respiratory  
53 Hospitalization; Europe; Modelling.

54

## 55 **Introduction**

56 It is globally estimated that respiratory syncytial virus (RSV) is associated with about 22% of  
57 all acute lower respiratory infections (ALRI) [1] and this results in approximately 101,400  
58 (84,500 – 125,200) deaths per year in young children [2]. Several studies have been conducted  
59 to understand the burden of RSV-associated infections, hospitalisations, and deaths in children  
60 in Europe. For example, Reeves et al. explored routinely collected hospital data on RSV in  
61 children aged <5 years in 7 European countries and compared these to RSV-associated  
62 admission rates [3], while Demont et al. provided information on the clinical and economic  
63 burden of RSV-associated hospitalisation in children aged <5 years in France between 2010  
64 and 2018 [4]. Despite these efforts, no estimates for RSV-associated hospitalisations are  
65 available for children in the EU as a whole.

66 RSV-associated hospitalisation estimates are important for public health purposes, as they can  
67 help allocate resources, and provide important insights and inputs for prevention measures and  
68 strategies. The establishment of a robust age-specific burden of disease estimates, which have  
69 often been limited due to a lack of routine testing for RSV [5], has also been underlined by the  
70 World Health Organization (WHO) [6].

71 In this paper, we present overall and country-specific estimates of RSV-associated respiratory  
72 hospitalisations (absolute numbers and rates) by age group in children aged less than 5 years  
73 in the 28 countries of the European Union (EU-28: includes the United Kingdom (UK) as it  
74 was part of EU when the data were collected) and Norway. We then used these estimates to  
75 calculate the proportion of RSV-associated hospitalisations among all-cause hospitalisations  
76 and respiratory hospitalisations in this age group, for each country. Estimates of the hospital  
77 burden of RSV are not available in many EU countries and our data will allow comparisons  
78 between countries and with other regions of the world, support efforts to communicate the RSV  
79 disease burden, and provide important data for decisions regarding future prevention and

80 control measures linked to various immunisation programmes (such as vaccines and/or  
81 monoclonal antibodies).

82

## 83 **Methods**

### 84 *Data sources*

85 We searched for published and unpublished national estimates of RSV-associated  
86 hospitalisations (defined as any admission that contained at least one respiratory infection-  
87 specific ICD-10 code at any point during admission) in children under 5 years in EU countries  
88 that were calculated using regression models as input data for the statistical analysis.

89

### 90 *RSV-associated hospitalisation estimates from the RESCEU project*

91 The data sources for Denmark, England, Finland, Norway, the Netherlands, and Scotland have  
92 been described in papers that were previously published by the REspiratory Syncytial virus  
93 Consortium in EUrope (RESCEU) [3]. Briefly, a retrospective study of overall respiratory  
94 hospital admissions (i.e., respiratory tract infections with or without an associated pathogen),  
95 RSV-related respiratory admissions, and other pathogen-respiratory admissions in children <5  
96 years of age using routinely collected hospital admissions databases was conducted in these 6  
97 countries of the EU/European Economic Area (EEA). Age-specific estimates of RSV-  
98 associated hospitalisations in children during 2006-2018 were calculated for these countries by  
99 using a linear regression approach [7], with estimates available for the following age groups:  
100 0-2, 3-5, 6-11, 12-35, and 36-59 months.

101

### 102 *Literature review estimates to identify estimates in other countries*

103 In order to increase the geographical representativeness of this work, we searched the scientific  
104 literature for additional data points in EU countries by adopting the same search strategy as a

105 previously published systematic review that aimed to estimate the global incidence, hospital  
106 admission rate, and mortality due to RSV in young children based on national estimates [2].  
107 The systematic review by Li et al. was broader in scope and inclusion criteria (i.e., they  
108 included studies reporting incidence and in-hospital and out-of-hospital mortality, not only  
109 hospitalisation rates), therefore, we considered that the included records needed to be further  
110 screened and assessed for eligibility in our review.

111 The new search was conducted according to the Preferred Reporting Items for Systematic  
112 Reviews and Meta-Analyses (PRISMA) statement [8]. The same search string as the systematic  
113 review conducted by Li and colleagues was used [2] (see Supplementary material); MEDLINE  
114 and EMBASE databases were searched from 1<sup>st</sup> January 2019 to 30<sup>th</sup> November 2021 for  
115 original articles. Papers published before 2019 that had been included by Li and colleagues  
116 were added to the reference list of relevant papers and further assessed for eligibility. No  
117 language restrictions were applied as long as an English abstract was available to decide on  
118 eligibility. To be included, a study had to report (i) national estimates of RSV-associated  
119 hospitalisations in children in EU countries calculated by using regression models (in order to  
120 have a homogeneous pool of estimates) (ii) details (i.e., ICD codes) on the diagnosis (i.e.,  
121 bronchiolitis, lower respiratory infections, etc.), and (iii) analyse the same age bands used by  
122 Johannesen and colleagues [7].

123 After removing duplicates, titles and abstracts were independently screened by two researchers  
124 (MDR and ROY) and the articles that were not excluded were retrieved in full copy and  
125 independently read by two authors (MDR and ROY). The papers that had been included in the  
126 previous systematic review were further assessed for eligibility, and the reference list of all  
127 eligible papers was checked by means of backward citation chaining for further relevant  
128 references. Data extraction was organised using an internally piloted spreadsheet [2]. The  
129 estimates reported by the included articles were then extracted and used as input data for the

130 statistical modelling, along with other information (data sources, details on the primary  
131 diagnosis, years in which the study was conducted, etc.). The quality assessment of the included  
132 studies was conducted by using a tool designed by Li et al. [2] (see Supplementary material).  
133 Based on the assessment of different questions (on study testing, subjects, case definition,  
134 sampling strategy, diagnostic tests, adjustment for health-care utilization) an overall score was  
135 calculated.

136

### 137 *Statistical Analysis*

138 A two stage-modelling approach was used to estimate the respiratory hospitalisation burden of  
139 RSV in children under 5 years old. This method was adapted from prior work focused on  
140 influenza-associated mortality during the 2009 pandemic [9] and for seasonal influenza [10].  
141 Since the period covered by the eligible studies was 2006-2018, the United Kingdom (UK) was  
142 included in the EU estimates.

143 In Stage 1, we identified annual age-specific estimates of RSV-associated hospitalisations from  
144 respiratory causes that were calculated using regression models. Data from the six RESCEU  
145 countries, plus those which were found in the literature and matched the inclusion criteria (see  
146 Results), were used as input data for Stage 2.

147 In Stage 2, we used the country estimates to extrapolate the hospitalisation burden and generate  
148 plausible values for all EU countries and Norway using two different modelling approaches,  
149 each involving two steps: (1) a data creation step using the matching approach or the multiple  
150 imputation approach, and (2) a data analysis step where a hierarchical linear random effects  
151 model is used to project the burden in all EU countries. For both approaches, the data creation  
152 step relied on 10 country-specific indicators representing health conditions at a demographic,  
153 geographic and population level (see Supplementary material) [9]. As two different sets of 10  
154 indicators were used, the statistical modelling produced 4 sets of results (see Supplementary

155 material), each related to the combination of one set of indicators and one modelling approach.  
156 An average of the four different models was calculated and this was used to calculate the  
157 absolute annual number and rates of RSV-associated hospitalisations (with uncertainty  
158 intervals) by country for the following age groups: 0-2, 3-5, 6-11, 12-35, and 36-59 months,  
159 which are consistent with the previously published age groups used by Johannesen and  
160 colleagues [7]. We also assessed the hospitalisations rate for EU28 in children aged 0-59  
161 months and calculated the ratio of hospitalisations that occurred in each age group, considering  
162 our estimated total number of RSV-associated hospitalisations as denominator.  
163 Finally, in order to compare RSV-associated hospitalisations to total respiratory and all-cause  
164 hospitalisations, the estimated absolute number of RSV-associated hospitalisations was used  
165 as the numerator to calculate the proportion of RSV-associated hospitalisations among  
166 respiratory and all-cause hospitalisations (data related to 2015) occurring in children under 5  
167 years. The population denominator (roughly 25,900,000 children under 59 months of age in  
168 EU28 in 2015) and other demographic indicators used for the analysis were obtained from  
169 Eurostat [11]. Statistical analyses were conducted using Stata version 16 (Stata Corp, College  
170 Station, TX).

171

## 172 **Results**

### 173 *Results of the literature review and Stage 1*

174 The literature search in MEDLINE and EMBASE produced 1,372 unique entries, and an  
175 additional 33 articles were found by backward citation chaining or because they had been  
176 included by Li and colleagues in the previous systematic review [2] (Figure 1). Of these, 1,304  
177 were excluded based on title and abstract and 101 were read in full text: 99 were excluded for  
178 not matching the inclusion criteria; the main reason for exclusion was not presenting national  
179 RSV-associated hospitalisation estimates calculated by using regression methods. Two studies,



180 in particular, were excluded as they focused on different age groups [12-13] but they provided  
181 useful estimates as they covered a country (England) that was included in Stage 1 (estimates  
182 for England were already available) and were therefore comparable to the data reported by  
183 Johannesen et al [7]. Finally, two studies [14-15] reporting RSV-associated hospitalisation  
184 estimates for Spain from 1997 to 2011 and for France during 2010-2018 were included in the  
185 review and their estimates were used as input data for the statistical modelling (Stage 2).  
186 Both studies reported RSV-associated hospitalisation rates per 100,000 children in age groups  
187 that were slightly different to those used by Johannesen et al.; we therefore only used data  
188 related to the age groups that were consistent with the estimates produced by Johannesen et al.  
189 [7] (12-35 months and 36-59 months for Spain and 0-2 months, 3-5 months, and 6-11 months  
190 for France). Moreover, the estimates for France were not annual but based on the epidemic  
191 periods only (October to March), so we recalculated the estimates for the whole year by  
192 arbitrarily assuming little RSV activity during April-September (10% of the activity observed  
193 from October to March [16]).  
194 In total, data from 8 countries were used as Stage 1 inputs [(Denmark, England, Finland,  
195 Norway, Netherlands, Scotland, France (age groups 0-2 months, 3-5 months, 6-11 months),  
196 and Spain (age groups 12-35 months, 36-59 months)] (Table 1).

197

### 198 *Stage 2 estimates*

199 We included Stage 1 estimates from 8 countries in our analysis, roughly representing 40% of  
200 the population of the EU and Norway [17]. The results produced by the four models were  
201 consistent across the age groups, the highest rates being calculated with the multiple imputation  
202 approach and the lowest rates being calculated with the nearest neighbour matching approach  
203 (5% variation between the highest and lowest estimates of RSV hospitalisation rates in children

204 aged 0-2 months) (see Supplementary material). Here, we present the results for the average of  
205 the four models.

206 We estimated the average number and average annual rate (per 1,000 population) of RSV-  
207 associated hospitalisations by age group in different countries (Table 2 and Table 3). We  
208 estimated that an average of 245,244 (95%CI 224,688-265,799) hospital admissions with  
209 respiratory infection were associated with RSV in the 28 EU countries per year in children  
210 under the age of 5, with most cases occurring among children aged less than 1 year (74.9%)  
211 and those aged 1-2 years (20.7%) (Table 4). Infants aged less than 2 months represented the  
212 most affected group (71.6 per 1,000 population; 95%CI: 66.6-76.6), with the rates declining as  
213 the children got older: 38.9 per 1,000 in children aged 3-5 months, 17.6 (6-11 months), 5.0 (12-  
214 35 months) and 1.0 (36-59 months). Overall, we estimated that an average of 10 children per  
215 1,000 living in the European Union are hospitalized due to RSV annually (average rates in  
216 children 0-59 months: 10.06, 9.90-10.21 per 1,000 population).

217 We also estimated country-specific RSV-associated respiratory hospitalisations for each of the  
218 29 countries and rates per 1,000 children (Table 2 and Table 3). The countries which had the  
219 highest absolute number of estimated hospitalisations were France (46,027 hospitalisations per  
220 year in children under 5 years), the UK (39,296 hospitalisations), and Germany (34,719  
221 hospitalisations).

222 The hospitalisation rates varied widely across the EU: in the first age group (0-2 months) they  
223 ranged from 47.4 (95%CI: 37.6-57.3) per 1,000 population in the Netherlands to 98.3 (88.5-  
224 108.1) in France. The Netherlands presented the lowest rates in almost all the other age groups:  
225 19.9 (14.5-25.4) per 1,000 population in children aged 3-5 months, 8.5 (5.7-11.3) in children  
226 aged 6-11 months, 1.9 (0.8-2.9) in children aged 12-35 months. The lowest rates for the age  
227 group 36-59 months were estimated for Norway (0.5, 95%CI 0.3-0.7). In the age group 0-5

228 years (0-59 months), the rates ranged from 8.61 (8.31-8.92) in Norway to 10.58 (10.30-18.86)  
229 in Spain.

230 Most RSV-associated hospitalisations occurred in children aged less than 1 year (74.9%  
231 averaged, ranging from 65.4% in Denmark to 80.7% in Spain (Table 4)). The youngest group  
232 (0-2 months) was the most affected, with percentages ranging from 27.5% in Denmark to  
233 43.8% in the Netherlands. RSV-associated hospitalisations were less likely in children aged  
234 from 3 to 4 years (36-59 months), with the percentage ranging from 3.3% in Finland to 8.4%  
235 in the Netherlands.

236

### 237 *Comparison with total paediatric hospitalisations and respiratory paediatric hospitalisations*

238 We compared the country estimates to total national paediatric hospitalisations and respiratory  
239 paediatric hospitalisations in the EU and Norway and found that RSV-associated  
240 hospitalisations represented from 1.8% (95%CI: 1.5-2.1; Lithuania) to 9.9 (95%CI: 8.4-11.5;  
241 Finland) of total hospitalisations in children younger than 5 years (Table 5) [11]. This  
242 percentage was higher for paediatric respiratory hospitalisations, ranging from 6.8% in  
243 Lithuania to 51.6% in Sweden, and these percentages are likely to be much higher during the  
244 winter, especially during the weeks when RSV circulates.

245

## 246 **Discussion**

247 Understanding the burden of disease caused by RSV, and specifically the incidence of  
248 hospitalisations and deaths, will help understand the impact of RSV prevention programs (new  
249 monoclonal antibodies and vaccines [18-21]). Our study estimated that an average of roughly  
250 250,000 respiratory hospitalisations in children younger than 5 years were associated with RSV  
251 each year in the 28 EU countries included in the analysis, with 3 out of 4 hospitalisations  
252 (ranging from 65.4% in Denmark to 80.7% Spain) occurring on average in children aged 0-11

253 months and 96% in those aged less than 0-23 months (ranging from 93.9% in Portugal to 97.7%  
254 in Norway) (Table 4).

255 We applied four extrapolation methods to obtain these estimates and saw no large differences  
256 across the outcomes: this was reassuring as it suggests that our results are not driven by the  
257 choice of a specific model. Consistently with previous studies, our results show an increase in  
258 RSV hospital admissions with a decrease in patient age, with infants under 1 year having the  
259 highest burden of RSV hospitalisations (especially those aged 0-2 months of age) [22]. Demont  
260 and colleagues reported a similar percentage (70%) of hospitalisations associated with RSV  
261 occurred in children <1 year [4] compared to our estimate for France (79%) and the EU-28  
262 (75%; Table 4). Glatman-Freedman et al. (Israel), Saravanos et al. (Australia) and Arriola et  
263 al. (United States) have also found the highest age-specific hospitalisation rates in children  
264 aged 0-2 months, with reductions in the other age groups [23-25]. This confirms how RSV  
265 immunisation programmes targeting the first 6 months of life could be highly effective in  
266 reducing most of the RSV hospitalisation burden [2].

267 Our estimates (and specifically the hospitalisation rates) varied strongly across the different  
268 EU countries, with the Netherlands having the lowest rates in almost all age groups (Norway  
269 has the lowest rates in the age group 3-4 years) and France having the highest rates, with the  
270 highest relative difference observed in the age group 12-35 months (the estimated rate for  
271 France was 5 times higher than the Netherlands). This finding is not entirely surprising as these  
272 results reflect the Stage 1 data inputs that were entered into the Stage 2 modelling procedure,  
273 where the Netherlands had the lowest [7] and France the highest rates [15]. Differences in the  
274 outcome coding and in the study design (the French study was conducted during the winter  
275 season, and we, therefore, needed to recalculate the estimates for a whole year) may explain  
276 the higher rates reported in France. From a methodological perspective, these results highlight

277 the importance of having Stage 1 estimates that are calculated in a harmonized manner as the  
278 Stage 2 extrapolations are sensitive to the Stage 1 inputs [26].

279 Whilst it is important to properly understand the real burden of disease associated with RSV in  
280 Europe and to estimate the potential impact of prevention efforts, it is not easy to compare our  
281 country-specific results with findings from the literature, considering the use of other methods  
282 to calculate these rates and the paucity of published studies. The recent, large perspective study  
283 by Wildenbeest and colleagues [27], conducted in 5 European countries, reported lower but  
284 comparable hospitalisation rates (1.8% RSV-associated hospitalisation in the first year of life  
285 in healthy term-born infants, 3.3% in children <3 months). The lower rates reported by  
286 Wildenbeest and colleagues might be related to the exclusion of pre-term infants or those at  
287 highest risk for severe illness [28] which were included in the studies used in our analysis [7,  
288 14-15]. Sanchez-Luna and colleagues reported between 5,997 (2005) and 8,637 (2012) hospital  
289 discharges for RSV bronchiolitis (ICD-9 code 466.11 as the principal diagnosis) in Spain in  
290 children aged under 1 year during 2004-2012 [28]. Our estimated number of average  
291 admissions per year for Spain in this age group was 14,446 (95%CI 12,228-16,662) and this  
292 reflects our hospitalisation estimate not being restricted to bronchiolitis, but all respiratory  
293 hospitalisations. Moreover, as reported for England by Green et al. [29], there is an observed  
294 general increase in RSV-associated admissions over the years that may be due to changes in  
295 healthcare policies (an increase in hospital bed availability or a change in the admission  
296 threshold) and this may explain the higher number of hospitalisations estimated by our study  
297 for Spain. Our study also shows how hospitalisations due to RSV in children under 5 years  
298 represent one of the leading causes of EU infant hospitalisations (Table 5): based on our  
299 estimates, up to 1 in 10 hospitalized children under 5 years of age may be associated to RSV,  
300 and this number is larger (around 4 out of 10 children in Italy, Portugal, Denmark and Finland,  
301 1 out of 2 in Sweden) if we only consider respiratory hospitalisations (Table 5). Accurate and

302 reliable patient-based data on hospitalisations for multiple pathogens in children under 5 years  
303 and the related cause(s) of the hospitalisation will be fundamental in assessing whether RSV is  
304 actually the leading cause of infant hospitalisations in Europe, as recently demonstrated for the  
305 United States [30].

306 Our study has a number of limitations: first, our extrapolations would benefit from more  
307 countries with RSV-associated estimates to populate the statistical models (e.g., additional  
308 country estimates in southern and eastern Europe); moreover, estimates based on prospectively  
309 collected data are needed to produce more reliable results (see Supplementary material). A  
310 second limitation is that the estimates used for Stage 1 are regression-based and this holds  
311 inherent uncertainties related to country-specific collection methods of laboratory data and ICD  
312 codes for hospital admissions (ICD-10 for all countries included except the study conducted in  
313 Spain, in which ICD-9-CM was used) [31]. Without uniform reporting systems and consistent  
314 coding practices, it is hard to generalize results to other countries. Despite this, whilst  
315 differences in coding can be profound when looking at a single code, they are reduced when  
316 the modelling builds on a wider range of codes (e.g., all respiratory codes, as done by  
317 Johannesen and colleagues [7]), as clinical practices and coding guidelines are less affected.  
318 Another limitation is that our estimates are based on country-specific hospitalisation rates that  
319 were calculated for different time periods (see Table 1), thus possibly influenced by differences  
320 in RSV circulation (e.g. types) over the years. Our study found substantial variation in the  
321 hospitalisation rates across Europe, but we did not explore these differences as this would  
322 require more advanced analysis methods which would include factors such as the circulation  
323 of other respiratory viruses (e.g., influenza and SARS-CoV-2), healthcare (indicators related  
324 to access and quality of healthcare or differences in the clinical practice), climatic and  
325 environmental factors [32-33]. We also used two sets of ten indicators to produce the  
326 extrapolations (see Supplementary material): these sets were chosen based on the availability

327 of data in all included countries (e.g., Scotland and England for the UK) and are not always  
328 specific to RSV. From a statistical perspective, this point is not likely to influence the estimates  
329 (as the indicators only aim to capture variability across countries), but it would be more elegant  
330 to develop indicator sets that are better aligned with RSV, as was done for influenza [9]. For  
331 example, the inclusion of indoor and outdoor pollution, which was reported by Nenna and  
332 colleagues as a risk factor for acute bronchiolitis in infants aged less than 3 years old [34], or  
333 the rates of premature birth, average maternal age, and delayed infant vaccinations, reported  
334 by Hardelid and co-authors as risk factors associated with increased RSV hospitalisations,  
335 could be considered [35]). Finally, our extrapolations are based on a period in which COVID-  
336 19 was not present: it would be preferable to have more recent estimates to understand the  
337 impact of the COVID-19 pandemic on RSV circulation [36] and its burden in terms of  
338 infections, hospitalisations, and deaths.

339 Despite these limitations, our study is, to our knowledge, the first attempt to estimate the RSV  
340 hospitalisation burden in children under the age of 5 years across Europe, and in EU countries  
341 for which no estimates have been produced so far. These estimates should help optimize public  
342 health responses (e.g., the allocation of more resources to pediatric hospitals during the winter  
343 season) and support planning for future immunisation programs [37]. Moreover, they represent  
344 a benchmark to understand to understand changes in the RSV burden after the COVID-19  
345 pandemic and in the future following the introduction of RSV immunisation programs in  
346 Europe.

347

348 Study group members

349 The RESCEU investigators are as follows:

350 Harish NAIR (University of Edinburgh), Harry CAMPBELL (University of Edinburgh),

351 Philippe Beutels (Universiteit Antwerpen), Louis Bont (University Medical Center Utrecht),

352 Andrew Pollard (University of Oxford), Peter Openshaw (Imperial College London), Federico  
353 Martinon-Torres (Servicio Galego de Saude), Terho Heikkinen (University of Turku and Turku  
354 University Hospital), Adam Meijer (National Institute for Public Health and the Environment),  
355 Thea K. Fischer (Statens Serum Institut), Maarten van den Berge (University of Groningen),  
356 Carlo Giaquinto (PENTA Foundation), Michael Abram (AstraZeneca), Kena Swanson  
357 (Pfizer), Bishoy Rizkalla (GlaxoSmithKline), Charlotte Vernhes (Sanofi Pasteur), Scott  
358 Gallichan (Sanofi Pasteur), Jeroen Aerssens (Janssen), Veena Kumar (Novavax), Eva Molero  
359 (Team-It Research)

360

361 Financial support

362 This work is part of RESCEU. RESCEU has received funding from the Innovative Medicines  
363 Initiative 2 Joint Undertaking under grant agreement No 116019. This Joint Undertaking  
364 receives support from the European Union's Horizon 2020 research and innovation programme  
365 and EFPIA. This publication only reflects the author's view, and the JU is not responsible for  
366 any use that may be made of the information it contains herein.

367

368 Disclaimer

369 Data from the Norwegian Patient Registry have been used in this publication. The  
370 interpretation and reporting of these data are the sole responsibility of the authors, and no  
371 endorsement by the Norwegian Patient Registry is intended nor should be inferred. This work  
372 reflects only the author's views and opinions. The EC is not responsible for any use that may  
373 be made of the information it contains.

374

375 Potential conflicts of interest



376 HC reports grants, personal fees, and nonfinancial support from World Health Organization.  
377 Grants and personal fees from Sanofi Pasteur. Grants from Bill and Melinda Gates Foundation.  
378 All payments were made via the University of Edinburgh. HC is a shareholder in the Journal  
379 of Global Health Ltd. JP declares that Nivel has received unrestricted research grants regarding  
380 the epidemiology of RSV from Sanofi Pasteur and IMI in the past 12 months.

381 Table 1. Description of the data sources that provided Stage 1 estimates

| Author, year          | Country     | Period of observation | Age groups                        | Age groups whose estimates were used as inputs | Outcome coding                                                                                                                                                   |
|-----------------------|-------------|-----------------------|-----------------------------------|------------------------------------------------|------------------------------------------------------------------------------------------------------------------------------------------------------------------|
| Johannesen, 2022 [7]  | Denmark     | 2010-2017             | 0-2m, 3-5m, 6-11m, 12-35m, 36-59m | 0-2m, 3-5m, 6-11m, 12-35m, 36-59m              | ICD-10; J00, J02-06 acute upper respiratory tract infection (URTI); J09-18 Pneumonia & influenza; J20-21, J40 Bronchiolitis and bronchitis; J22 Unspecified LRTI |
| Johannesen, 2022 [7]  | England     | 2007-2017             | 0-2m, 3-5m, 6-11m, 12-35m, 36-59m | 0-2m, 3-5m, 6-11m, 12-35m, 36-59m              | ICD-10; J00, J02-06 acute upper respiratory tract infection (URTI); J09-18 Pneumonia & influenza; J20-21, J40 Bronchiolitis and bronchitis; J22 Unspecified LRTI |
| Johannesen, 2022 [7]  | Finland     | 2006-2016             | 0-2m, 3-5m, 6-11m, 12-35m, 36-59m | 0-2m, 3-5m, 6-11m, 12-35m, 36-59m              | ICD-10; J00, J02-06 acute upper respiratory tract infection (URTI); J09-18 Pneumonia & influenza; J20-21, J40 Bronchiolitis and bronchitis; J22 Unspecified LRTI |
| Johannesen, 2022 [7]  | Netherlands | 2013-2017             | 0-2m, 3-5m, 6-11m, 12-35m, 36-59m | 0-2m, 3-5m, 6-11m, 12-35m, 36-59m              | ICD-10; J00, J02-06 acute upper respiratory tract infection (URTI); J09-18 Pneumonia & influenza; J20-21, J40 Bronchiolitis and bronchitis; J22 Unspecified LRTI |
| Johannesen, 2022 [7]  | Norway      | 2008-2017             | 0-2m, 3-5m, 6-11m, 12-35m, 36-59m | 0-2m, 3-5m, 6-11m, 12-35m, 36-59m              | ICD-10; J00, J02-06 acute upper respiratory tract infection (URTI); J09-18 Pneumonia & influenza; J20-21, J40 Bronchiolitis and bronchitis; J22 Unspecified LRTI |
| Johannesen, 2022 [7]  | Scotland    | 2010-2016             | 0-2m, 3-5m, 6-11m, 12-35m, 36-59m | 0-2m, 3-5m, 6-11m, 12-35m, 36-59m              | ICD-10; J00, J02-06 acute upper respiratory tract infection (URTI); J09-18 Pneumonia & influenza; J20-21, J40 Bronchiolitis and bronchitis; J22 Unspecified LRTI |
| Demont, 2020 [15]     | France      | 2010-2018             | 0-2m, 3-5m, 6-11m, 12-23m, 24-59m | 0-2m, 3-5m, 6-11m                              | ICD-10; J121, J205, J210, J219                                                                                                                                   |
| Gil-Prieto, 2015 [14] | Spain       | 1997-2011             | 0y, 1y, 2y, 3y, 4y, <5y, <2y      | 2y, 3y, 4y                                     | ICD-9-CM; 466, acute bronchitis and bronchiolitis; 480.1, pneumonia due to RSV; 079.6, RSV infection                                                             |

382 Table 2: Average RSV-associated hospitalisation rates per 1,000 population per age group per year

| Country           | 0-2 months (95%CI) <sup>a</sup> | 3-5 months (95%CI) <sup>a</sup> | 6-11 months (95%CI) <sup>a</sup> | 12-35 months (95%CI) <sup>b</sup> | 36-59 months (95%CI) <sup>b</sup> |
|-------------------|---------------------------------|---------------------------------|----------------------------------|-----------------------------------|-----------------------------------|
| EU28 <sup>c</sup> | 71.6 (66.6-76.6)                | 38.9 (36-41.9)                  | 17.6 (16.1-19.1)                 | 5 (4.4-5.5)                       | 1 (0.9-1.1)                       |
| Austria           | 65 (55.2-74.8)                  | 33.1 (27.7-38.5)                | 13.5 (10.7-16.4)                 | 4.5 (3.5-5.5)                     | 0.9 (0.7-1.1)                     |
| Belgium           | 68.6 (58.8-78.4)                | 36.3 (30.9-41.7)                | 15.9 (13.1-18.7)                 | 4.8 (3.8-5.9)                     | 1.2 (0.9-1.4)                     |
| Bulgaria          | 81.8 (72-91.6)                  | 48.9 (43.5-54.3)                | 21.2 (18.4-24)                   | 5.5 (4.5-6.6)                     | 1 (0.8-1.2)                       |
| Croatia           | 79.4 (69.7-89.2)                | 42.6 (37.2-48)                  | 19 (16.2-21.8)                   | 4.8 (3.8-5.8)                     | 0.9 (0.7-1.1)                     |
| Cyprus            | 78.4 (68.6-88.2)                | 41.3 (35.9-46.7)                | 16.7 (13.9-19.5)                 | 5.5 (4.5-6.5)                     | 0.9 (0.7-1.1)                     |
| Czech Republic    | 73.9 (64.1-83.7)                | 41 (35.6-46.4)                  | 18.4 (15.6-21.2)                 | 5.7 (4.6-6.7)                     | 1.1 (0.9-1.3)                     |
| Denmark           | 59.2 (49.3-69)                  | 40.7 (35.3-46.2)                | 20.4 (17.5-23.2)                 | 7.5 (6.4-8.5)                     | 1.6 (1.4-1.8)                     |
| Estonia           | 69.8 (60-79.7)                  | 37.3 (31.8-42.7)                | 17.2 (14.4-20.1)                 | 5.1 (4-6.1)                       | 1 (0.8-1.2)                       |
| Finland           | 77.8 (67.9-87.7)                | 43.2 (37.7-48.6)                | 16.6 (13.8-19.4)                 | 5.2 (4.2-6.3)                     | 0.8 (0.6-1)                       |
| France            | 98.3 (88.5-108.1)               | 48.8 (43.4-54.2)                | 26 (23.2-28.8)                   | 5 (4-6.1)                         | 1.1 (0.9-1.3)                     |
| Germany           | 72.5 (62.7-82.2)                | 38.6 (33.2-44)                  | 17.5 (14.6-20.3)                 | 5.2 (4.2-6.3)                     | 1 (0.8-1.2)                       |
| Greece            | 82.6 (72.8-92.4)                | 44.3 (38.9-49.7)                | 19.1 (16.3-21.9)                 | 4.5 (3.4-5.5)                     | 0.9 (0.7-1.1)                     |
| Hungary           | 75.3 (65.5-85.1)                | 44.7 (39.3-50.1)                | 19.8 (16.9-22.6)                 | 5.4 (4.4-6.4)                     | 1.1 (0.9-1.3)                     |
| Ireland           | 70.1 (60.3-79.9)                | 47 (41.6-52.4)                  | 22.6 (19.8-25.4)                 | 7.1 (6-8.1)                       | 1.3 (1-1.5)                       |
| Italy             | 80.9 (71.1-90.7)                | 41.7 (36.3-47.1)                | 18.1 (15.3-20.9)                 | 4.3 (3.2-5.3)                     | 0.9 (0.7-1.1)                     |

|                |                  |                  |                  |               |               |
|----------------|------------------|------------------|------------------|---------------|---------------|
| Latvia         | 75 (65.2-84.8)   | 41.3 (35.9-46.7) | 18.4 (15.6-21.2) | 4.6 (3.6-5.7) | 1.1 (0.8-1.3) |
| Lithuania      | 73.6 (63.8-83.4) | 38.5 (33.1-43.9) | 17 (14.2-19.8)   | 4 (3-5)       | 0.9 (0.7-1.1) |
| Luxembourg     | 63.5 (53.7-73.3) | 32.6 (27.2-38)   | 13.1 (10.3-15.9) | 5 (4-6.1)     | 0.9 (0.7-1.1) |
| Malta          | 64.8 (54.8-74.7) | 35.2 (29.7-40.7) | 17.9 (15-20.7)   | 5.4 (4.4-6.5) | 1.3 (1.1-1.5) |
| Netherlands    | 47.4 (37.6-57.3) | 19.9 (14.5-25.4) | 8.5 (5.7-11.3)   | 1.9 (0.8-2.9) | 1.1 (0.9-1.3) |
| Norway         | 54.6 (44.5-64.7) | 34.8 (29.3-40.3) | 15.4 (12.5-18.2) | 6.6 (5.6-7.7) | 0.5 (0.3-0.7) |
| Poland         | 71.4 (61.6-81.2) | 36.5 (31.1-41.9) | 16.2 (13.4-19.1) | 4.6 (3.5-5.6) | 0.9 (0.7-1.1) |
| Portugal       | 70.2 (60.4-80)   | 31.7 (26.3-37.1) | 15.2 (12.4-18)   | 4.5 (3.4-5.5) | 1.2 (0.9-1.4) |
| Romania        | 68.8 (59-78.6)   | 37.7 (32.3-43.1) | 19.4 (16.6-22.2) | 4.1 (3.1-5.2) | 1 (0.8-1.2)   |
| Slovakia       | 74.6 (64.8-84.3) | 42 (36.6-47.4)   | 18.8 (16-21.6)   | 4.7 (3.7-5.8) | 0.8 (0.6-1)   |
| Slovenia       | 75.4 (65.6-85.2) | 42.6 (37.2-48)   | 17.6 (14.8-20.4) | 5.2 (4.2-6.2) | 1.1 (0.9-1.3) |
| Spain          | 69.4 (59.6-79.2) | 32.6 (27.2-38)   | 16.8 (14-19.6)   | 3 (2-4.1)     | 0.8 (0.6-1)   |
| Sweden         | 63 (53.1-72.8)   | 35.5 (30.1-41)   | 16.9 (14.1-19.7) | 5.3 (4.3-6.3) | 1.2 (1-1.4)   |
| United Kingdom | 63.4 (47.8-79.1) | 38.9 (29.7-48.1) | 18.9 (14.2-23.6) | 6.1 (4.4-7.9) | 1.3 (1-1.6)   |

383 <sup>a</sup> RSV-associated hospitalisation rates in these three age groups for the 29 countries are estimated by also including data from France reported by Demont and

384 colleagues [15]

385 <sup>b</sup> RSV-associated hospitalisation rates in these two age groups for the 29 countries are estimated by also including data from Spain reported by Gil-Prieto and colleagues

386 [14]

387 <sup>c</sup> Includes the UK and excludes Norway

388 Table 3: Average RSV-associated hospitalisations per age group per year

| Country           | 0-2 months (95%CI) <sup>a</sup> | 3-5 months (95%CI) <sup>a</sup> | 6-11 months (95%CI) <sup>a</sup> | 12-35 months (95%CI) <sup>b</sup> | 36-59 months (95%CI) <sup>b</sup> |
|-------------------|---------------------------------|---------------------------------|----------------------------------|-----------------------------------|-----------------------------------|
| EU28 <sup>c</sup> | 90,200 (83,923-96,476)          | 49,052 (45,328-52,776)          | 44,369 (40,529-48,208)           | 50,852 (45,249-56,456)            | 10,771 (9,659-11,883)             |
| Austria           | 1,308 (1,111-1,505)             | 667 (558-775)                   | 545 (432-658)                    | 732 (563-902)                     | 147 (112-182)                     |
| Belgium           | 2,141 (1,836-2,446)             | 1,133 (965-1,302)               | 992 (816-1,167)                  | 1,235 (973-1,497)                 | 306 (250-362)                     |
| Bulgaria          | 1,374 (1,210-1,539)             | 822 (732-913)                   | 714 (620-808)                    | 733 (596-869)                     | 141 (112-171)                     |
| Croatia           | 783 (687-880)                   | 420 (366-473)                   | 375 (320-431)                    | 391 (306-477)                     | 77 (59-95)                        |
| Cyprus            | 181 (159-204)                   | 95 (83-108)                     | 77 (64-90)                       | 106 (86-126)                      | 18 (13-22)                        |
| Czech Republic    | 2,031 (1,762-2,300)             | 1,128 (979-1,276)               | 1,012 (858-1,167)                | 1,237 (1,012-1,462)               | 258 (209-308)                     |
| Denmark           | 846 (704-986)                   | 582 (504-660)                   | 582 (500-662)                    | 864 (744-985)                     | 199 (172-225)                     |
| Estonia           | 238 (205-271)                   | 127 (108-146)                   | 118 (98-137)                     | 141 (112-170)                     | 32 (25-38)                        |
| Finland           | 1,122 (980-1,264)               | 622 (544-701)                   | 479 (398-561)                    | 625 (501-750)                     | 97 (71-124)                       |
| France            | 18,145 (16,336-19,952)          | 9,018 (8,021-10,015)            | 9,587 (8,548-10,626)             | 7,573 (5,998-9,148)               | 1,704 (1,368-2,040)               |
| Germany           | 12,977 (11,223-14,731)          | 6,906 (5,939-7,874)             | 6,252 (5,244-7,260)              | 7,250 (5,802-8,699)               | 1,334 (1,039-1,629)               |
| Greece            | 1,895 (1,670-2,119)             | 1,015 (891-1,139)               | 875 (746-1,003)                  | 862 (661-1,063)                   | 193 (147-239)                     |
| Hungary           | 1,748 (1,521-1,975)             | 1,038 (913-1,163)               | 917 (787-1,048)                  | 976 (788-1,164)                   | 199 (161-237)                     |
| Ireland           | 1,139 (980-1,298)               | 764 (676-851)                   | 735 (643-826)                    | 950 (810-1,091)                   | 176 (146-206)                     |
| Italy             | 10,111 (8,888-11,334)           | 5,213 (4,538-5,888)             | 4,534 (3,832-5,236)              | 4,475 (3,387-5,563)               | 1,021 (787-1,256)                 |

|                |                       |                     |                     |                      |                     |
|----------------|-----------------------|---------------------|---------------------|----------------------|---------------------|
| Latvia         | 407 (353-459)         | 224 (195-253)       | 200 (169-230)       | 190 (148-232)        | 40 (32-48)          |
| Lithuania      | 559 (485-633)         | 292 (251-333)       | 258 (215-300)       | 241 (179-304)        | 54 (42-67)          |
| Luxembourg     | 96 (82-111)           | 49 (41-58)          | 40 (31-49)          | 64 (51-77)           | 12 (9-15)           |
| Malta          | 69 (59-80)            | 38 (32-44)          | 38 (32-44)          | 47 (38-57)           | 11 (9-13)           |
| Netherlands    | 2,071 (1,641-2,502)   | 870 (633-1,108)     | 741 (494-988)       | 651 (292-1,011)      | 398 (319-475)       |
| Norway         | 811 (661-961)         | 517 (435-599)       | 456 (370-542)       | 812 (682-941)        | 61 (34-89)          |
| Poland         | 6,542 (5,646-7,439)   | 3,346 (2,852-3,842) | 2,979 (2,464-3,494) | 3,459 (2,669-4,249)  | 730 (557-903)       |
| Portugal       | 1,444 (1,243-1,645)   | 651 (540-762)       | 627 (511-742)       | 769 (590-949)        | 226 (185-268)       |
| Romania        | 3,300 (2,830-3,769)   | 1,807 (1,548-2,066) | 1,860 (1,590-2,129) | 1,540 (1,150-1,929)  | 389 (305-472)       |
| Slovakia       | 1,035 (900-1,170)     | 583 (509-658)       | 523 (445-600)       | 531 (414-648)        | 98 (72-123)         |
| Slovenia       | 399 (347-451)         | 225 (197-254)       | 186 (156-216)       | 225 (180-270)        | 48 (38-57)          |
| Spain          | 7,399 (6,356-8,442)   | 3,473 (2,897-4,048) | 3,574 (2,975-4,172) | 2,670 (1,762-3,578)  | 788 (585-992)       |
| Sweden         | 1,824 (1,538-2,110)   | 1,030 (872-1,187)   | 980 (816-1,144)     | 1,229 (987-1,471)    | 288 (237-339)       |
| United Kingdom | 12,333 (9,291-15,375) | 7,565 (5,778-9,351) | 7,352 (5,515-9,188) | 9,890 (7,128-12,652) | 2,156 (1,614-2,698) |

389 <sup>a</sup> RSV-associated hospitalisation in these three age groups are estimated by also including data from France reported by Demont and colleagues [15]

390 <sup>b</sup> RSV-associated hospitalisation in these two age groups are estimated by also including data from Spain reported by Gil-Prieto and colleagues [14]

391 <sup>c</sup> Includes the UK and excludes Norway

392 Table 4: Ratio of RSV-associated hospitalisation occurring in children aged less than 1 year, from 1 to 2 years and from 3 to 4 years (100% is  
 393 represented by all RSV-associated hospitalisation occurring in children under 5 years).

| Country           | 0-2 months <sup>a</sup> - % | 3-5 months <sup>a</sup> - % | 6-11 months <sup>a</sup> - % | 0-11 months <sup>a,b</sup> - % | 12-35 months <sup>c</sup> - % | 36-59 months <sup>c</sup> - % |
|-------------------|-----------------------------|-----------------------------|------------------------------|--------------------------------|-------------------------------|-------------------------------|
| EU28 <sup>d</sup> | 36.8%                       | 20.0%                       | 18.1%                        | 74.9                           | 20.7                          | 4.4                           |
| Austria           | 38.5%                       | 19.6%                       | 16.0%                        | 74.1                           | 21.6                          | 4.3                           |
| Belgium           | 36.9%                       | 19.5%                       | 17.1%                        | 73.4                           | 21.3                          | 5.3                           |
| Bulgaria          | 36.3%                       | 21.7%                       | 18.9%                        | 76.9                           | 19.4                          | 3.7                           |
| Croatia           | 38.3%                       | 20.5%                       | 18.3%                        | 77.1                           | 19.1                          | 3.8                           |
| Cyprus            | 37.9%                       | 19.9%                       | 16.1%                        | 74.0                           | 22.2                          | 3.8                           |
| Czech Republic    | 35.8%                       | 19.9%                       | 17.9%                        | 73.6                           | 21.8                          | 4.6                           |
| Denmark           | 27.5%                       | 18.9%                       | 18.9%                        | 65.4                           | 28.1                          | 6.5                           |
| Estonia           | 36.3%                       | 19.4%                       | 18.0%                        | 73.6                           | 21.5                          | 4.9                           |
| Finland           | 38.1%                       | 21.1%                       | 16.3%                        | 75.5                           | 21.2                          | 3.3                           |
| France            | 39.4%                       | 19.6%                       | 20.8%                        | 79.8                           | 16.5                          | 3.7                           |
| Germany           | 37.4%                       | 19.9%                       | 18.0%                        | 75.3                           | 20.9                          | 3.8                           |
| Greece            | 39.2%                       | 21.0%                       | 18.1%                        | 78.2                           | 17.8                          | 4.0                           |
| Hungary           | 35.8%                       | 21.3%                       | 18.8%                        | 75.9                           | 20.0                          | 4.1                           |
| Ireland           | 30.3%                       | 20.3%                       | 19.5%                        | 70.1                           | 25.2                          | 4.7                           |

|                |       |       |       |      |      |     |
|----------------|-------|-------|-------|------|------|-----|
| Italy          | 39.9% | 20.6% | 17.9% | 78.3 | 17.7 | 4.0 |
| Latvia         | 38.4% | 21.1% | 18.9% | 78.3 | 17.9 | 3.8 |
| Lithuania      | 39.8% | 20.8% | 18.4% | 79.0 | 17.2 | 3.8 |
| Luxembourg     | 36.8% | 18.8% | 15.3% | 70.9 | 24.5 | 4.6 |
| Malta          | 34.0% | 18.7% | 18.7% | 71.4 | 23.2 | 5.4 |
| Netherlands    | 43.8% | 18.4% | 15.7% | 77.8 | 13.8 | 8.4 |
| Norway         | 30.5% | 19.5% | 17.2% | 67.1 | 30.6 | 2.3 |
| Poland         | 38.4% | 19.6% | 17.5% | 75.4 | 20.3 | 4.3 |
| Portugal       | 38.8% | 17.5% | 16.9% | 73.2 | 20.7 | 6.1 |
| Romania        | 37.1% | 20.3% | 20.9% | 78.3 | 17.3 | 4.4 |
| Slovakia       | 37.4% | 21.0% | 18.9% | 77.3 | 19.2 | 3.5 |
| Slovenia       | 36.8% | 20.8% | 17.2% | 74.8 | 20.8 | 4.4 |
| Spain          | 41.3% | 19.4% | 20.0% | 80.7 | 14.9 | 4.4 |
| Sweden         | 34.1% | 19.2% | 18.3% | 71.6 | 23.0 | 5.4 |
| United Kingdom | 31.4% | 19.3% | 18.7% | 69.3 | 25.2 | 5.5 |

394 <sup>a</sup> RSV-associated hospitalisations in this age group are estimated by also including data from France reported by Demont and colleagues [15]

395 <sup>b</sup> Calculated as a total of the previous three age groups (0-2 months, 3-5 months, 6-11 months)

396 <sup>c</sup> RSV-associated hospitalisations in these two age groups are estimated by also including data from Spain reported by Gil-Prieto and colleagues [14]

397 <sup>d</sup> Includes the UK and excludes Norway



398 Table 5: Hospitalizations in children under 5 years (all causes and respiratory causes) in EU28 countries and Norway, and % of all

399 hospitalisations and all respiratory hospitalisations that were due to RSV.

| Country        | Hospitalizations in children under 5 years, all causes <sup>a</sup> | Hospitalizations in children under 5 years, respiratory causes <sup>a</sup> | RSV-associated hospitalisations in children under 5 years <sup>b</sup> | % of all hospitalisations in children under 5 years due to RSV | % of all respiratory hospitalisations in children under 5 years due to RSV |
|----------------|---------------------------------------------------------------------|-----------------------------------------------------------------------------|------------------------------------------------------------------------|----------------------------------------------------------------|----------------------------------------------------------------------------|
| Austria        | na                                                                  | 16,305                                                                      | 3,399 (2,776-4,022)                                                    |                                                                | 20.8 (17.0-24.7)                                                           |
| Belgium        | na                                                                  | na                                                                          | 5,807 (4,840-6,774)                                                    |                                                                |                                                                            |
| Bulgaria       | na                                                                  | na                                                                          | 3,784 (3,270-4,300)                                                    |                                                                |                                                                            |
| Croatia        | 62,972                                                              | 8,060                                                                       | 2,046 (1,738-2,356)                                                    | 3.2 (2.8-3.7)                                                  | 25.4 (21.6-29.2)                                                           |
| Cyprus         | 6,839                                                               | 1,568                                                                       | 477 (405-550)                                                          | 7.0 (5.9-8.0)                                                  | 30.4 (25.8-35.1)                                                           |
| Czech Republic | 196,900                                                             | 26,813                                                                      | 5,666 (4,820-6,513)                                                    | 2.9 (2.4-3.3)                                                  | 21.1 (18.0-24.3)                                                           |
| Denmark        | 47,695                                                              | 7,672                                                                       | 3,073 (2,624-3,518)                                                    | 6.4 (5.5-7.4)                                                  | 40.1 (34.2-45.9)                                                           |
| Estonia        | na                                                                  | na                                                                          | 656 (548-762)                                                          |                                                                |                                                                            |
| Finland        | 29,637                                                              | 6,854                                                                       | 2,945 (2,494-3,400)                                                    | 9.9 (8.4-11.5)                                                 | 43.0 (36.4-49.6)                                                           |
| France         | 1,229,788                                                           | 127,538                                                                     | 46,027 (40,271-51,781)                                                 | 3.7 (3.3-4.2)                                                  | 36.1 (31.6-40.6)                                                           |
| Germany        | 1,253,873                                                           | 162,515                                                                     | 34,719 (29,247-40,193)                                                 | 2.8 (2.3-3.2)                                                  | 21.4 (18.0-24.7)                                                           |
| Greece         | na                                                                  | na                                                                          | 4,840 (4,115-5,563)                                                    |                                                                |                                                                            |
| Hungary        | 175,698                                                             | 29,555                                                                      | 4,878 (4,170-5,587)                                                    | 2.8 (2.4-3.2)                                                  | 16.5 (14.1-18.9)                                                           |

|                |         |         |                        |               |                  |
|----------------|---------|---------|------------------------|---------------|------------------|
| Ireland        | 53,504  | 11,637  | 3,764 (3,255-4,272)    | 7.0 (6.1-8.0) | 32.3 (28.0-36.7) |
| Italy          | 731,993 | 62,922  | 25,354 (21,432-29,277) | 3.5 (2.9-4.0) | 40.3 (34.1-46.5) |
| Latvia         | na      | 9,608   | 1,061 (897-1,222)      |               | 11.0 (9.3-12.7)  |
| Lithuania      | 78,166  | 20,663  | 1,404 (1,172-1,637)    | 1.8 (1.5-2.1) | 6.8 (5.7-7.9)    |
| Luxembourg     | na      | 777     | 261 (214-310)          |               | 33.6 (27.5-39.9) |
| Malta          | 7,030   | 642     | 203 (170-238)          | 2.9 (2.4-3.4) | 31.6 (26.5-37.1) |
| Netherlands    | na      | 18,201  | 4,731 (3,379-6,084)    |               | 26.0 (18.6-33.4) |
| Norway         | 84,850  | 7,251   | 2,657 (2,182-3,132)    | 3.1 (2.6-3.7) | 36.6 (30.1-43.2) |
| Poland         | 664,693 | 120,409 | 17,056 (14,188-19,927) | 2.6 (2.1-3.0) | 14.2 (11.8-16.5) |
| Portugal       | 98,167  | 8,069   | 3,717 (3,069-4,366)    | 3.8 (3.1-4.4) | 46.1 (38.0-54.1) |
| Romania        | 424,339 | 123,377 | 8,896 (7,423-10,365)   | 2.1 (1.7-2.4) | 7.2 (6.0-8.4)    |
| Slovakia       | 113,651 | 19,071  | 2,770 (2,340-3,199)    | 2.4 (2.1-2.8) | 14.5 (12.3-16.8) |
| Slovenia       | 46,511  | 7,346   | 1,083 (918-1,248)      | 2.3 (2.0-2.7) | 14.7 (12.5-17.0) |
| Spain          | na      | 58,598  | 17,904 (14,575-21,232) |               | 30.6 (24.9-36.2) |
| Sweden         | na      | 10,362  | 5,351 (4,450-6,251)    |               | 51.6 (42.9-60.3) |
| United Kingdom | 979,392 | 116,819 | 39,296 (29,326-49,264) | 4.0 (3.0-5.0) | 33.6 (25.1-42.2) |

400 na: not available

401 <sup>a</sup>Data are related to 2015 [11]

402 <sup>b</sup>Estimates calculated in the present manuscript.

403 **References**

- 404 1. Shi T, McAllister DA, O'Brien KL, et al. Global, regional, and national disease burden  
405 estimates of acute lower respiratory infections due to respiratory syncytial virus in  
406 young children in 2015: a systematic review and modelling study. *Lancet* 2017; 390:  
407 946–958.
- 408 2. Li Y, Wang X, Blau DM, et al. Global, regional, and national disease burden estimates  
409 of acute lower respiratory infections due to respiratory syncytial virus in children  
410 younger than 5 years in 2019: a systematic analysis. *Lancet* 2022; 399: 2047–2064.
- 411 3. Reeves RM, van Wijhe M, Tong S, et al. Respiratory Syncytial Virus-Associated  
412 Hospital Admissions in Children Younger Than 5 Years in 7 European Countries Using  
413 Routinely Collected Datasets. *J Infect Dis* 2020; 222: S599–S605.
- 414 4. Demont C, Petrica N, Bardoulat I, et al. Economic and disease burden of RSV-  
415 associated hospitalisations in young children in France, from 2010 through 2018. *BMC*  
416 *Infect Dis* 2021; 21: 730.
- 417 5. Lee N, Walsh EE, Sander I, et al. Delayed Diagnosis of Respiratory Syncytial Virus  
418 Infections in Hospitalized Adults: Individual Patient Data, Record Review Analysis and  
419 Physician Survey in the United States. *J Infect Dis* 2019; 220: 969–979.
- 420 6. Modjarrad K, Giersing B, Kaslow DC, et al. WHO consultation on Respiratory  
421 Syncytial Virus Vaccine Development Report from a World Health Organization  
422 Meeting held on 23-24 March 2015. *Vaccine* 2016. p. 190–197.
- 423 7. Johannesen CK, van Wijhe M, Tong S, et al. Age-Specific Estimates of Respiratory  
424 Syncytial Virus-Associated Hospitalizations in 6 European Countries: A Time Series  
425 Analysis. *J Infect Dis* 2022; 226: S29–S37.
- 426 8. Page MJ, McKenzie JE, Bossuyt PM, et al. The PRISMA 2020 statement: an updated  
427 guideline for reporting systematic reviews. *BMJ* 2021; 372: n71.

- 428 9. Simonsen L, Spreeuwenberg P, Lustig R, et al. Global mortality estimates for the 2009  
429 Influenza Pandemic from the GLaMOR project: a modeling study. *PLoS Med* 2013;  
430 10: e1001558.
- 431 10. Paget J, Spreeuwenberg P, Charu V, et al. Global mortality associated with seasonal  
432 influenza epidemics: New burden estimates and predictors from the GLaMOR Project.  
433 *J Glob Health* 2019; 9: 20421.
- 434 11. Eurostat. Hospital discharges and length of stay statistics. Available at:  
435 [https://ec.europa.eu/eurostat/statistics-](https://ec.europa.eu/eurostat/statistics-explained/index.php?title=Hospital_discharges_and_length_of_stay_statistics&oldid=561104#Hospital_discharges_by_sex_and_age)  
436 [explained/index.php?title=Hospital\\_discharges\\_and\\_length\\_of\\_stay\\_statistics&oldid=](https://ec.europa.eu/eurostat/statistics-explained/index.php?title=Hospital_discharges_and_length_of_stay_statistics&oldid=561104#Hospital_discharges_by_sex_and_age)  
437 [561104#Hospital\\_discharges\\_by\\_sex\\_and\\_age](https://ec.europa.eu/eurostat/statistics-explained/index.php?title=Hospital_discharges_and_length_of_stay_statistics&oldid=561104#Hospital_discharges_by_sex_and_age) [last accessed 10 July 2022]
- 438 12. Reeves RM, Hardelid P, Gilbert R, et al. Estimating the burden of respiratory syncytial  
439 virus (RSV) on respiratory hospital admissions in children less than five years of age  
440 in England, 2007-2012. *Influenza Other Respir Viruses* 2017; 11: 122–129.
- 441 13. Cromer D, van Hoek AJ, Newall AT, et al. Burden of paediatric respiratory syncytial  
442 virus disease and potential effect of different immunisation strategies: a modelling and  
443 cost-effectiveness analysis for England. *Lancet Public Health* 2017; 2: e367–e374.
- 444 14. Gil-Prieto R, Gonzalez-Escalada A, Marín-García P, et al. Respiratory Syncytial Virus  
445 Bronchiolitis in Children up to 5 Years of Age in Spain: Epidemiology and  
446 Comorbidities: An Observational Study. *Medicine* 2015; 94: e831.
- 447 15. Demont C, Bizouard G, Watier L, et al. Excess hospitalisations associated with RSV  
448 among children under 5 years old in France from 2010 to 2018. *ESCAIDE Abstract*  
449 *Book*. 2020. 24-27 November. Available at: [https://www.escaide.eu/en/general-](https://www.escaide.eu/en/general-information/abstract-books)  
450 [information/abstract-books](https://www.escaide.eu/en/general-information/abstract-books) [Last accessed 30 June 2022].

- 451 16. Li Y, Wang X, Broberg EK, et al. Seasonality of respiratory syncytial virus and its  
452 association with meteorological factors in 13 European countries, week 40 2010 to  
453 week 39 2019. *Euro Surveill* 2022; 27.
- 454 17. Eurostat. Demography, population stock, and balance. Available at:  
455 [https://ec.europa.eu/eurostat/web/population-demography/demography-population-  
456 stock-balance/database](https://ec.europa.eu/eurostat/web/population-demography/demography-population-<br/>456 stock-balance/database) [last accessed 10 July 2022]
- 457 18. Hammitt LL, Dagan R, Yuan Y, et al. Nirsevimab for Prevention of RSV in Healthy  
458 Late-Preterm and Term Infants. *N Engl J Med* 2022; 386: 837–846.
- 459 19. Karron RA. Preventing respiratory syncytial virus (RSV) disease in children. *Science*  
460 2021; 372: 686–687.
- 461 20. Mazur NI, Terstappen J, Baral R, et al. Respiratory syncytial virus prevention within  
462 reach: the vaccine and monoclonal antibody landscape. *Lancet Infect Dis* 2023; 23: e2–  
463 e21.
- 464 21. Teirlinck AC, Broberg EK, Stuwitz Berg A, et al. Recommendations for respiratory  
465 syncytial virus surveillance at the national level. *Eur Respir J* 2021; 58.
- 466 22. Bont L, Checchia PA, Fauroux B, et al. Defining the Epidemiology and Burden of  
467 Severe Respiratory Syncytial Virus Infection Among Infants and Children in Western  
468 Countries. *Infect Dis Ther* 2016; 5: 271–298.
- 469 23. Glatman-Freedman A, Kaufman Z, Applbaum Y, et al. Respiratory Syncytial Virus  
470 hospitalisation burden: a nation-wide population-based analysis, 2000-2017. *J Infect*  
471 2020; 81: 297–303.
- 472 24. Saravanos GL, Sheel M, Homaira N, et al. Respiratory syncytial virus-associated  
473 hospitalisations in Australia, 2006-2015. *Med J Aust* 2019; 210: 447–453.

- 474 25. Arriola CS, Kim L, Langley G, et al. Estimated Burden of Community-Onset  
475 Respiratory Syncytial Virus-Associated Hospitalizations Among Children Aged <2  
476 Years in the United States, 2014-15. *J Pediatric Infect Dis Soc* 2020; 9: 587–595.
- 477 26. Paget J, Danielle Iuliano A, Taylor RJ, et al. Estimates of mortality associated with  
478 seasonal influenza for the European Union from the GLaMOR project. *Vaccine* 2022;  
479 40: 1361–1369.
- 480 27. Sanchez-Luna M, Elola FJ, Fernandez-Perez C, et al. Trends in respiratory syncytial  
481 virus bronchiolitis hospitalisations in children less than 1 year: 2004-2012. *Curr Med  
482 Res Opin* 2016; 32: 693–698.
- 483 28. American Lung Association. Learn about respiratory syncytial virus (RSV). 2021.  
484 Available at: [https://www.lung.org/lung-health-diseases/lung-disease-  
485 lookup/rsv/learn-about-rsv](https://www.lung.org/lung-health-diseases/lung-disease-lookup/rsv/learn-about-rsv). Last accessed [20 Dec 2022].
- 486 29. Wildenbeest JG, Billard M-N, Zuurbier RP, et al. The burden of respiratory syncytial  
487 virus in healthy term-born infants in Europe: a prospective birth cohort study. *Lancet  
488 Respir Med* 2022.
- 489 30. Green CA, Yeates D, Goldacre A, et al. Admission to hospital for bronchiolitis in  
490 England: trends over five decades, geographical variation and association with perinatal  
491 characteristics and subsequent asthma. *Arch Dis Child* 2016; 101: 140–146.
- 492 31. Suh M, Movva N, Jiang X, et al. Respiratory Syncytial Virus Is the Leading Cause of  
493 United States Infant Hospitalizations, 2009-2019: A Study of the National  
494 (Nationwide) Inpatient Sample. *J Infect Dis* 2022; 226: S154–S163.
- 495 32. Simoes EAF. Environmental and demographic risk factors for respiratory syncytial  
496 virus lower respiratory tract disease. *J Pediatr* 2003; 143: S118–26.
- 497 33. Fitzpatrick T, McNally JD, Stukel TA, et al. Family and Child Risk Factors for Early-  
498 Life RSV Illness. *Pediatrics* 2021; 147.

- 499 34. Nenna R, Cutrera R, Frassanito A, et al. Modifiable risk factors associated with  
500 bronchiolitis. *Ther Adv Respir Dis* 2017; 11: 393–401.
- 501 35. Hardelid P, Verfuerden M, McMenamin J, et al. The contribution of child, family and  
502 health service factors to respiratory syncytial virus (RSV) hospital admissions in the  
503 first 3 years of life: birth cohort study in Scotland, 2009 to 2015. *Euro Surveill* 2019;  
504 24.
- 505 36. van Summeren J, Meijer A, Aspelund G, et al. Low levels of respiratory syncytial virus  
506 activity in Europe during the 2020/21 season: what can we expect in the coming  
507 summer and autumn/winter? *Euro Surveill* 2021; 26.
- 508 37. Sande CJ. Implementation strategies for passive respiratory syncytial virus  
509 immunisation. *Lancet Infect Dis* 2021; 21: 1200–120  
510

Figure 1: Systematic review flow diagram

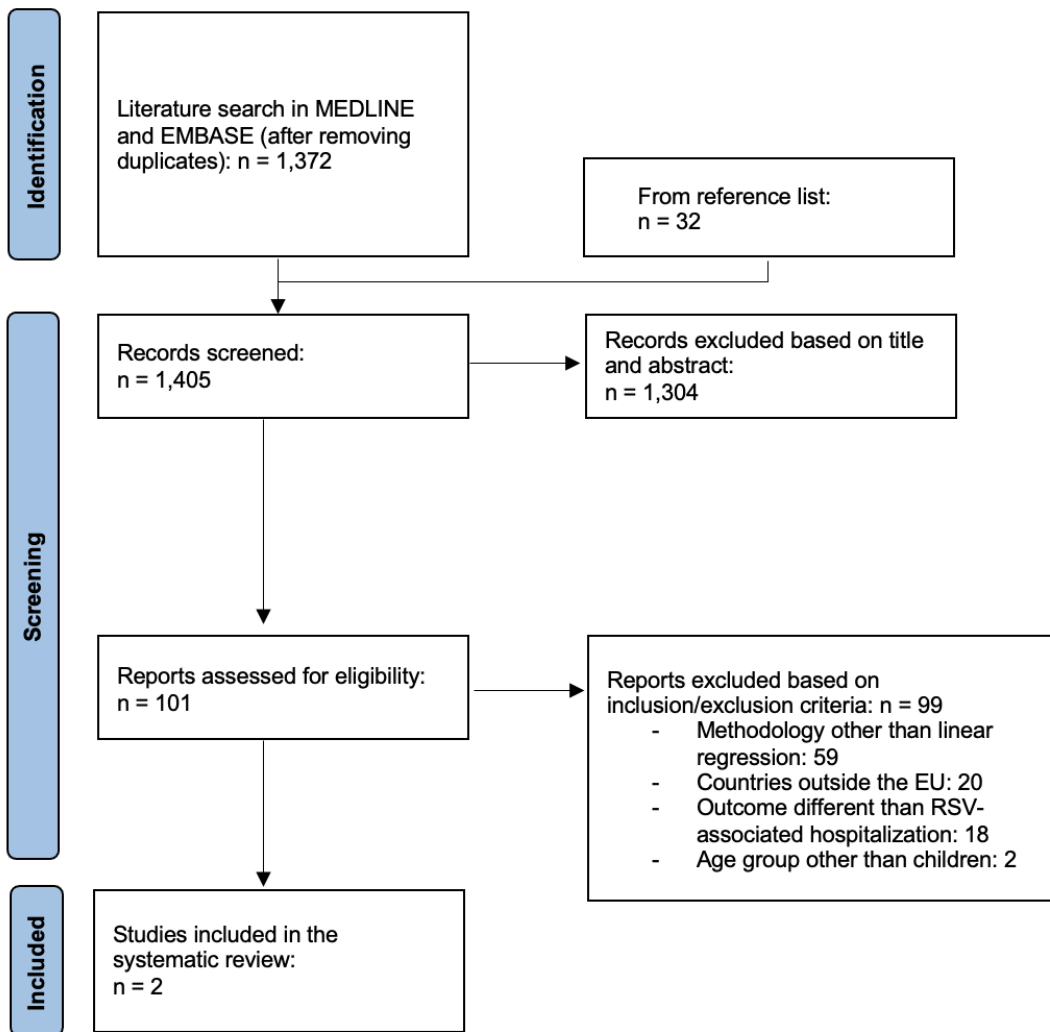



Figure 2: RSV Hospitalization rates per 1,000 population in different age groups

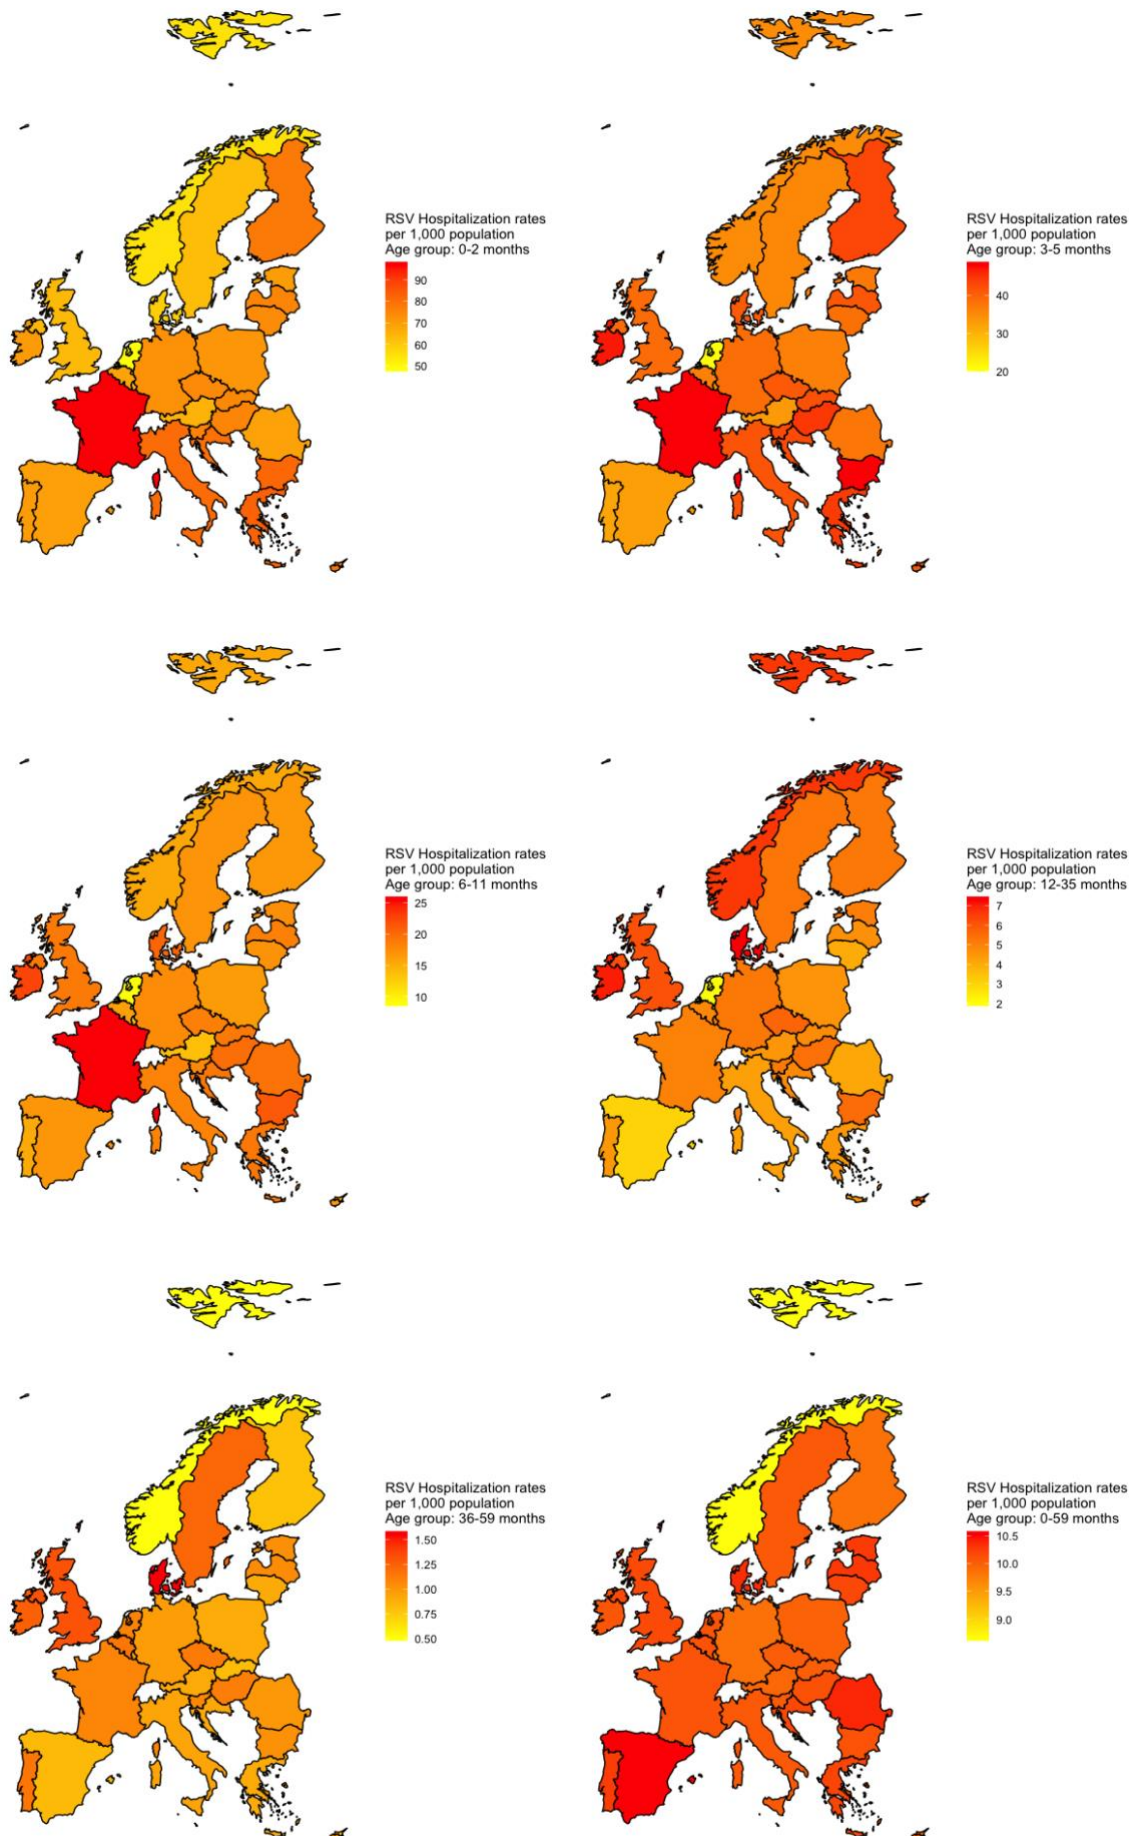

Source: https://www.medrxiv.org/content/10.1101/2023.02.10.23285756.full.pdf
